# Supplementary material for: The Roots ofAtractylodes macrocephalaKoidzumi Enhanced Glucose and Lipid Metabolism in C2C12 Myotubes via Mitochondrial Regulation
Source: Hindawi journal article supplement (doi:10.1155/2015/643654), 2015-01-01

Supplementary figure 1. HPLC fingerprintings of ARA extract and Atractylenolide III

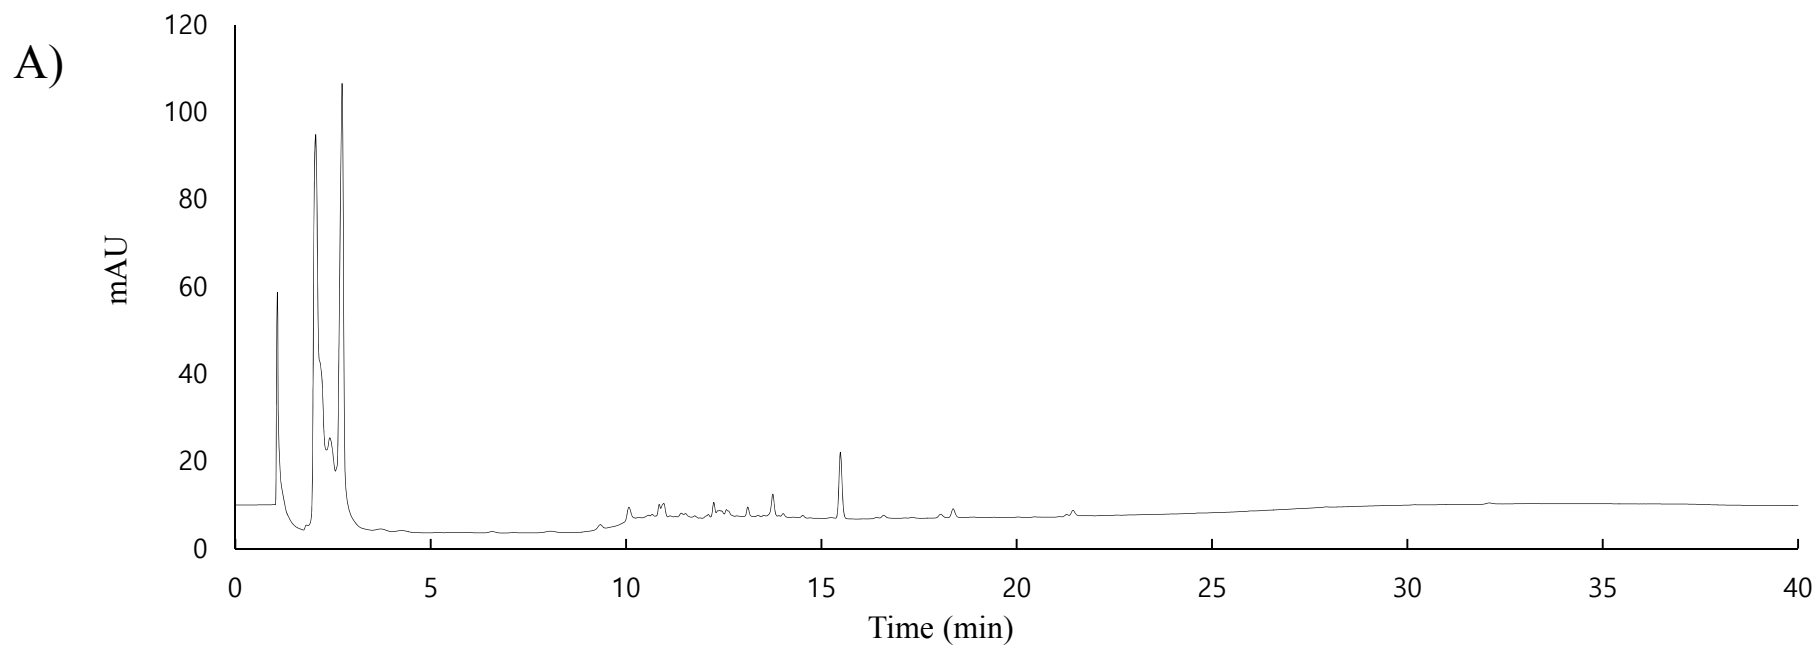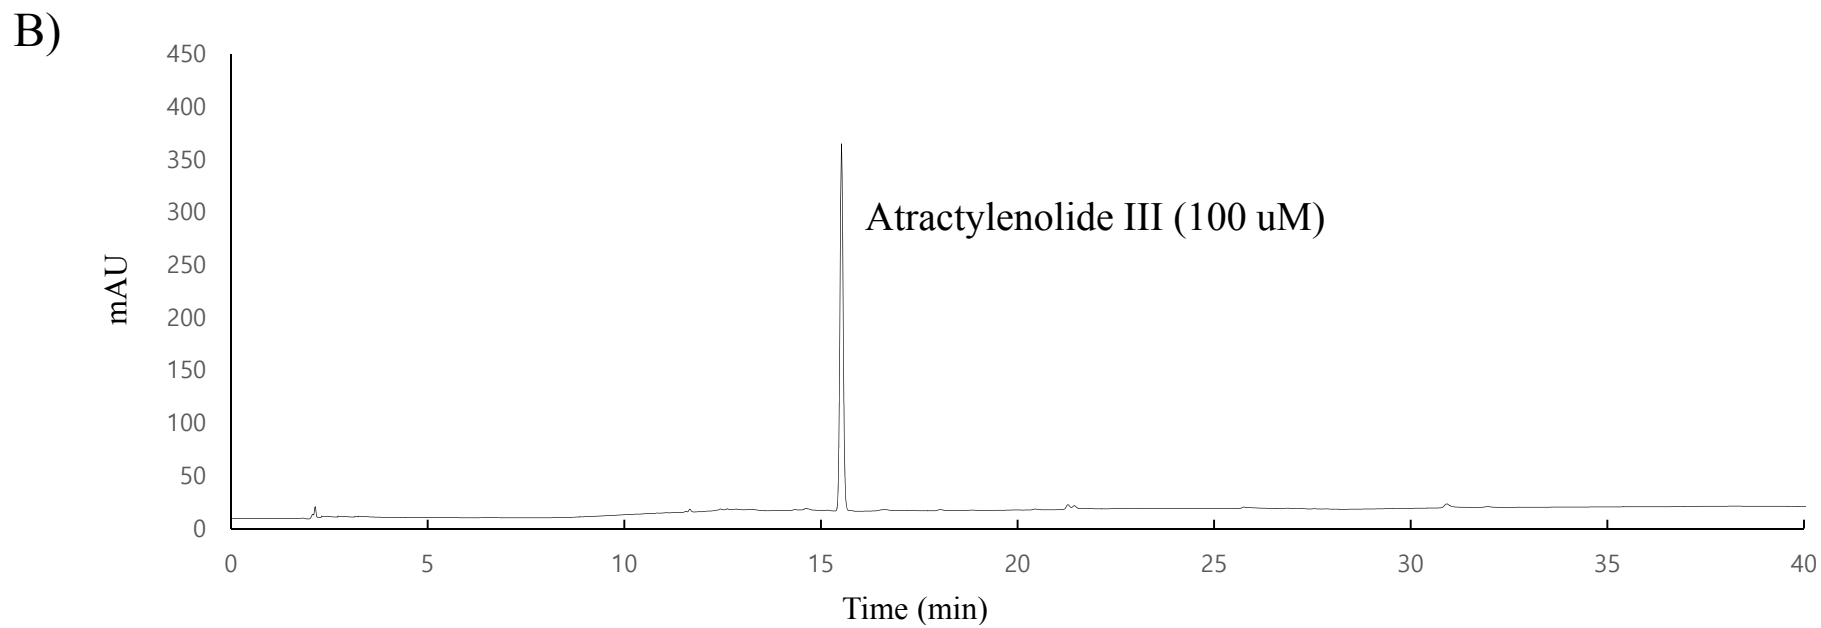

Supplement: f1 [file 643654.f1.pdf]
